# Supplementary figures and images for: Commensal bacteria exacerbate seizure‐like phenotypes in Drosophila voltage‐gated sodium channel mutants
Source: PubMed Central journal article supplement — Genes Brain Behav. 2024 Sep 4;23(5):e70000. doi: 10.1111/gbb.70000 (PMC11373613; doi:10.1111/gbb.70000), 2024-09-04

**A**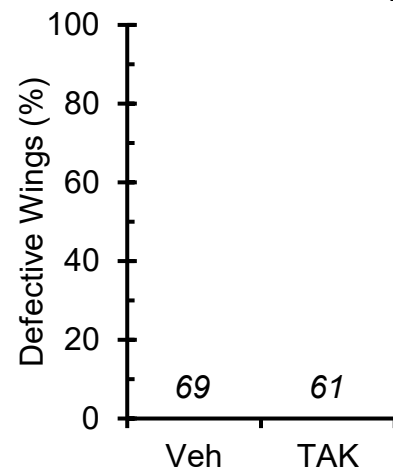**B**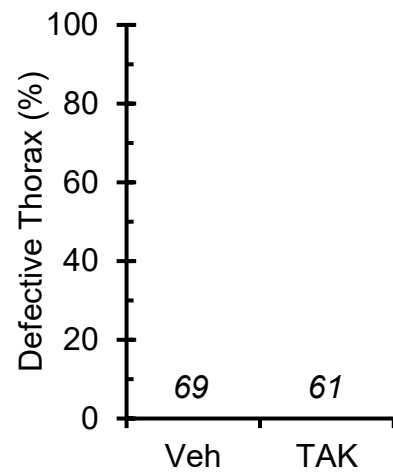**C**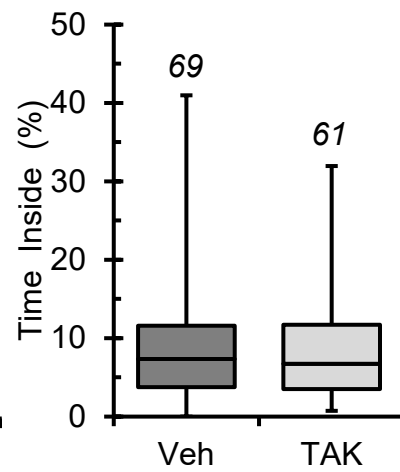**D**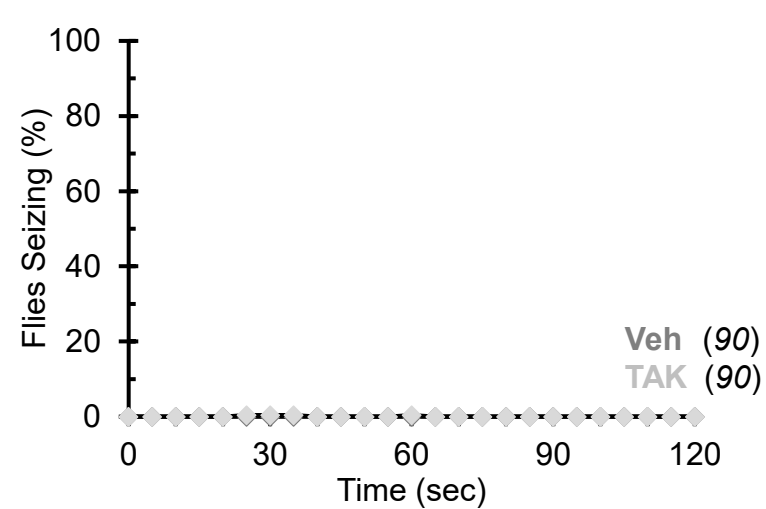

Supplement: GBB-23-e70000-s001.pdf [file GBB-23-e70000-s001.pdf]

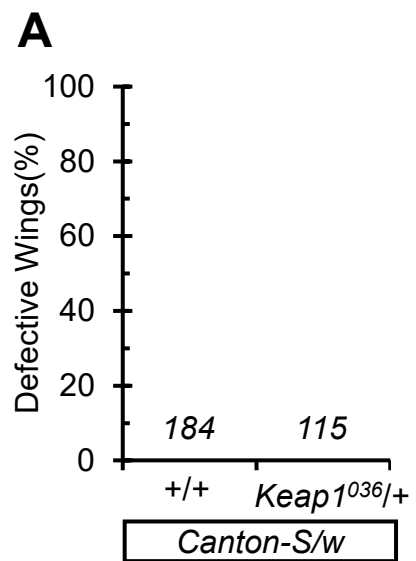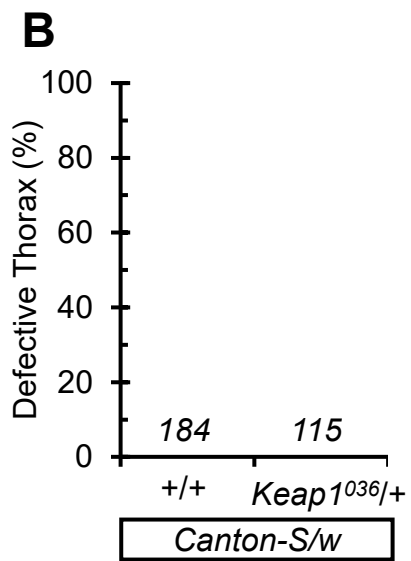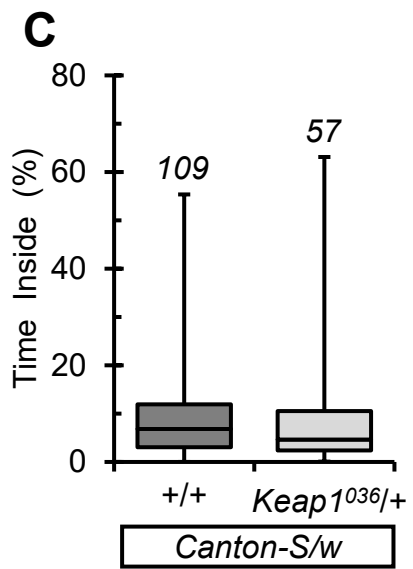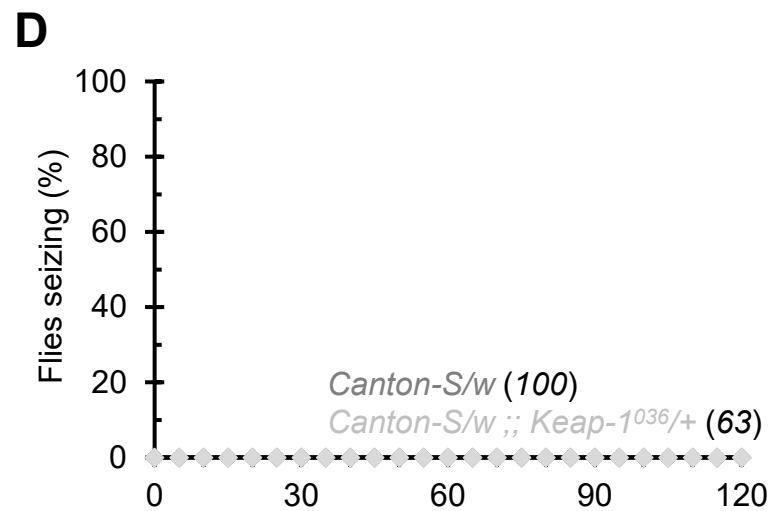

Supplement: GBB-23-e70000-s002.pdf [file GBB-23-e70000-s002.pdf]

**A**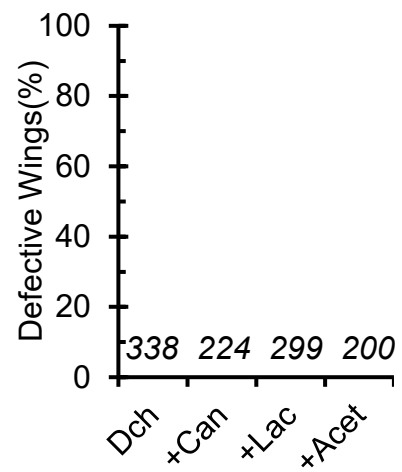**B**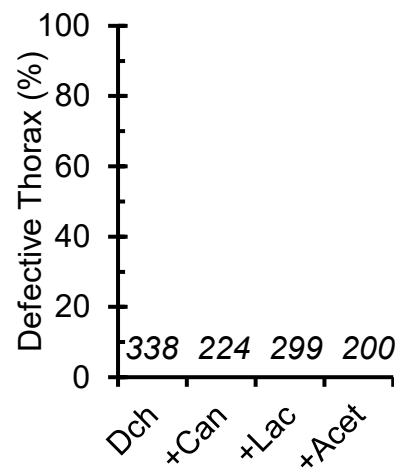**C**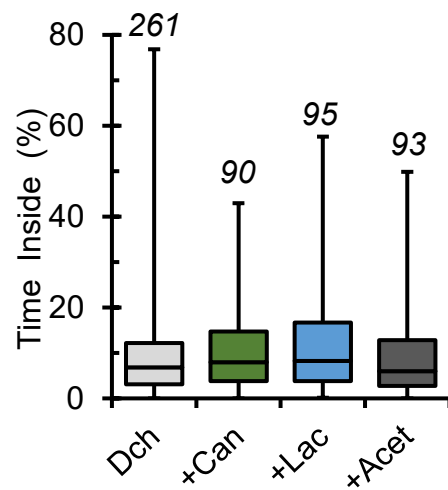**D**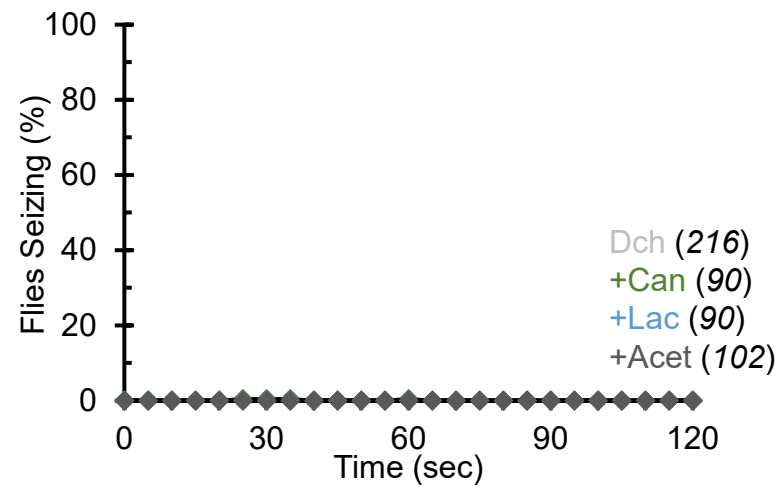

Supplement: GBB-23-e70000-s003.pdf [file GBB-23-e70000-s003.pdf]

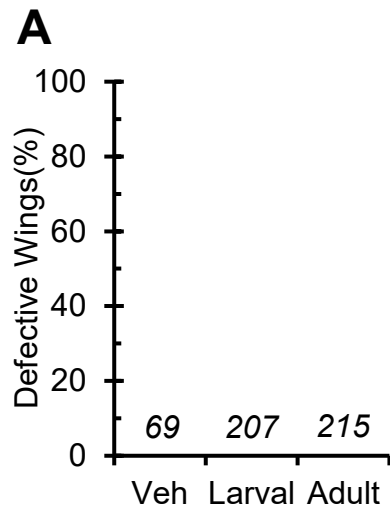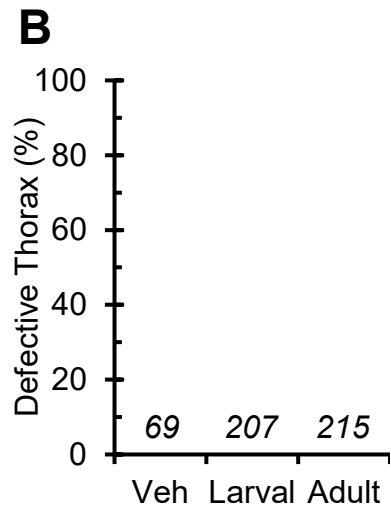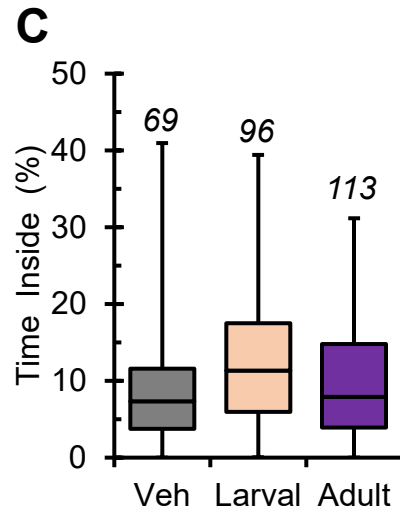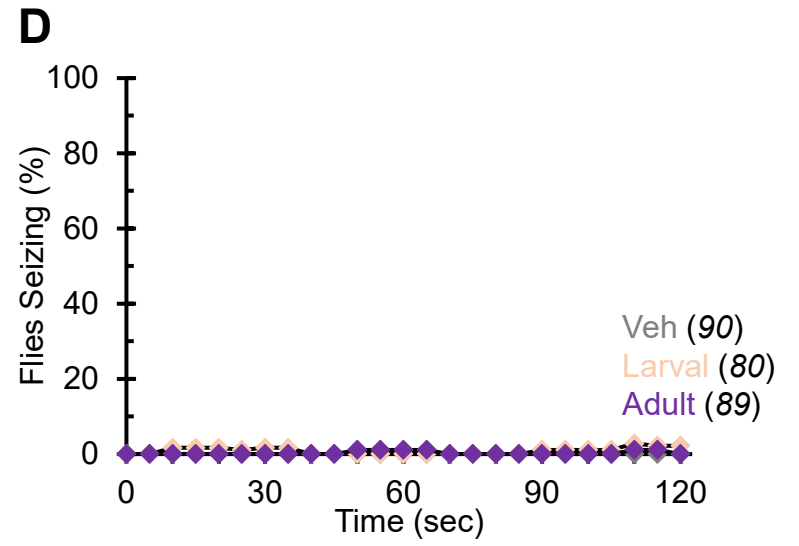

Supplement: GBB-23-e70000-s005.pdf [file GBB-23-e70000-s005.pdf]

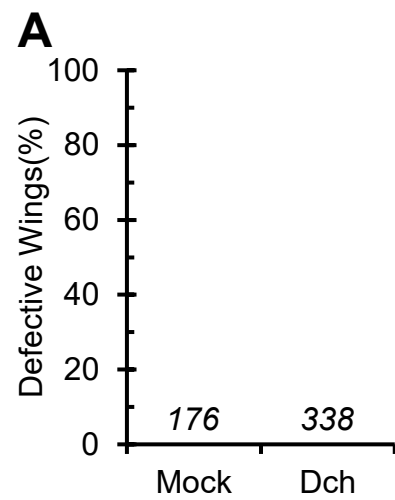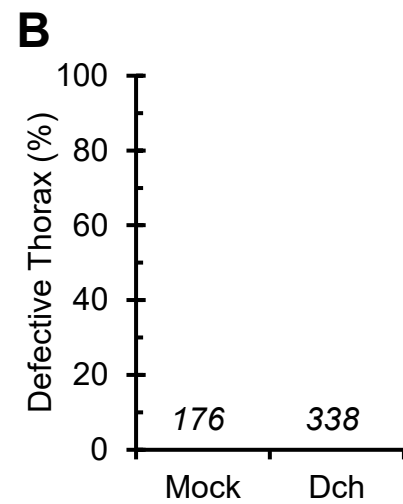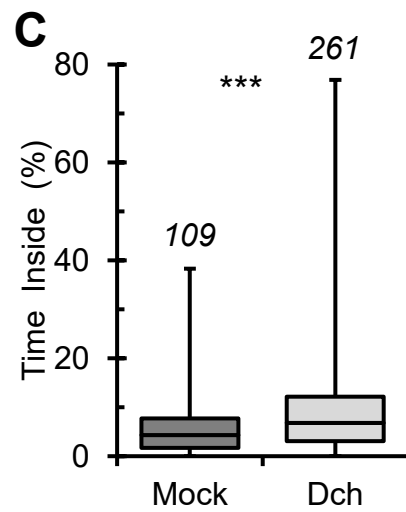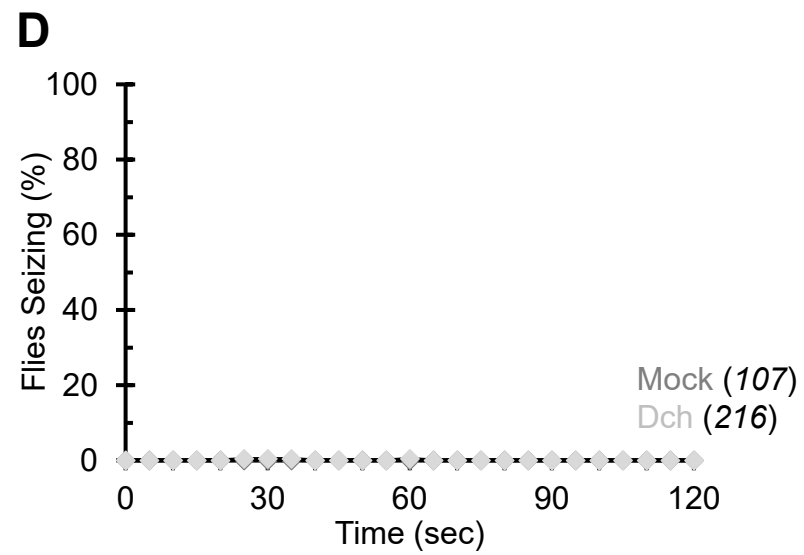

Supplement: GBB-23-e70000-s006.pdf [file GBB-23-e70000-s006.pdf]
